# Supplementary material
Source: publisher site journal article supplement (https://www.spandidos-publications.com/5032/downloadSupplementary)

Figure S1. pMSCVpuro retroviral vector restriction map. pMSCVpuro contains a puromycin resistance gene (Puro<sup>r</sup>) for antibiotic selection in tissue culture and an *E. coli* (Amp<sup>r</sup>) gene for clonal selection and propagation (adapted from [www.clontech.com](http://www.clontech.com)).

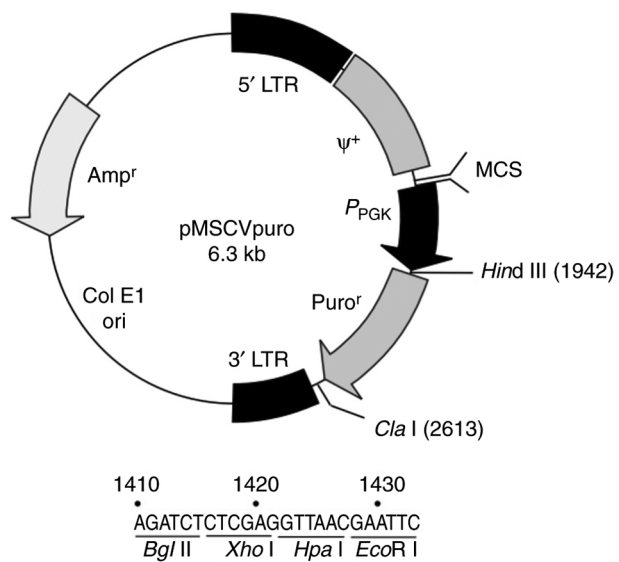

Figure S2. Immortalized human keratinocytes (HaCaT) were transfected with the pMSCVpuro (control), pMSCVpuro HPV16E7 and pMSCVpuro HPV18E7 vectors. Successful transfection of cells with HPV16 E7 and HPV18 E7 viral oncogene plasmids was confirmed using reverse transcription-quantitative PCR using HPV16/18 E7 primers, respectively. \*\*\*P<0.001 vs. pMSCVpuro control). HPV, human papillomavirus.

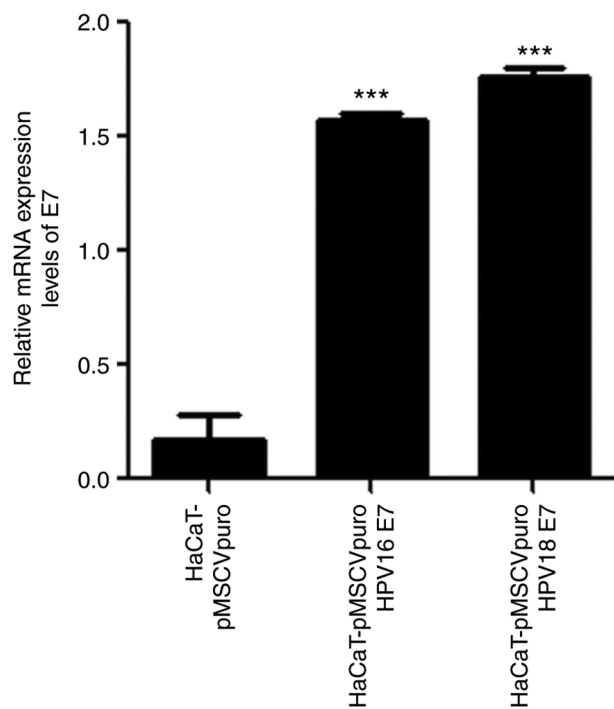

Supplement: Supplementary file 1 [file downloadSupplementary]
